# Supplementary material for: Regular undulation and polarization modulation on the film surface of a planarly aligned SmC* polymer
Source: Royal Society of Chemistry journal article supplement (doi:10.1039/c0sm00668h), 2010-10-13
Supplement: c0sm00668h.pdf [file c0sm00668h.pdf]

# Supporting Information

## **Regular undulation and polarization modulation on film surface of homogeneously aligned chiral S<sub>C</sub>\* polymer**

**Chunying Zhang, Ryohei Ishige, Ryou Yasumatsu, Sungmin Kang\*, Masatoshi Tokita and Junji Watanabe**

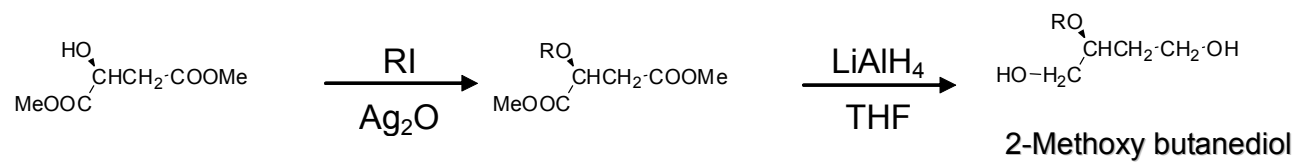

5

Scheme S1 Synthetic route of 2-methoxy butanediol.

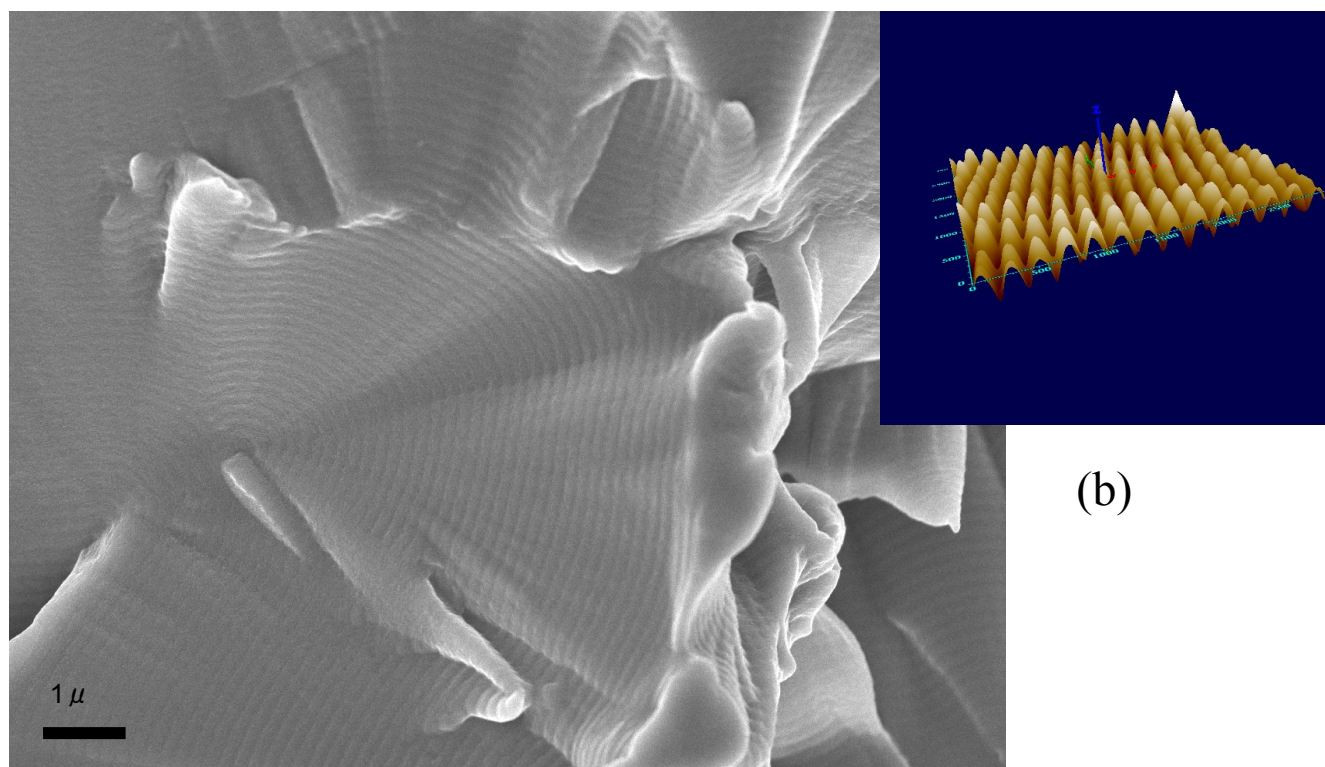

(a)

Fig.S1 (a) FE-SEM images observed on the fractured surface from the glassy  $S_C^*$  phase of P-40(HM)/60(S-MOB) and (b) its 3D view of the AFM image.

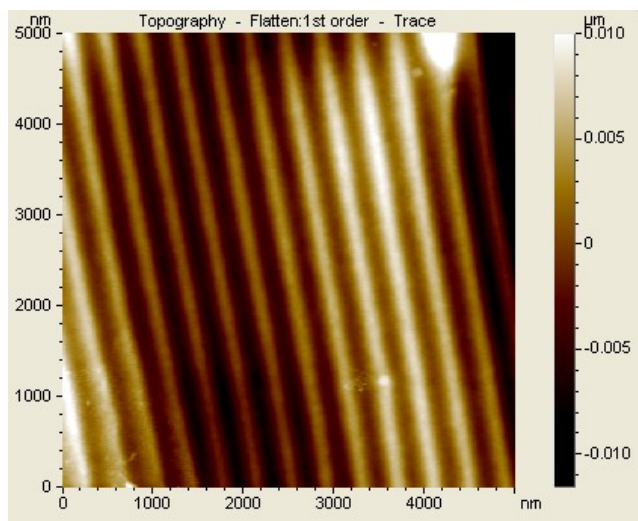

(a) AFM image

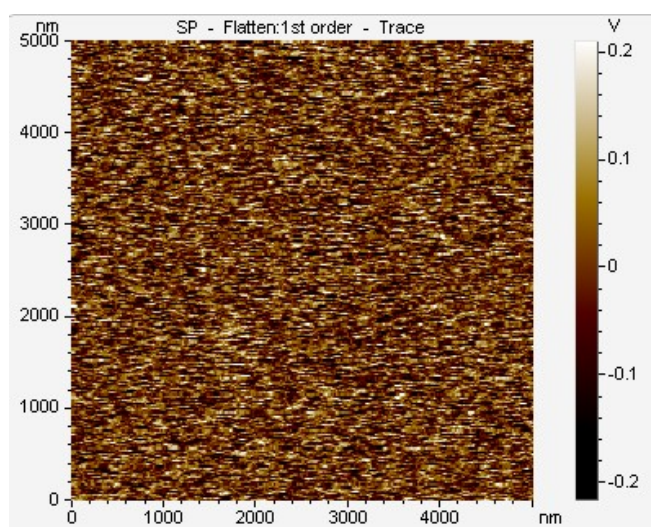

(b) KFM image

Fig.S2 AFM and KFM images observed for the PVA film imprinting the surface undulation of chiral  $S_C^*$  in P-40(HM)/60(S-MB). Here, the PVA solution in water was cast onto the chiral  $S_C^*$  solid film and after the water evaporated, the PVA film was removed.
